# Supplementary figures and images for: Arterial and venous thromboembolism in COVID-19: a study-level meta-analysis
Source: HighWire-hosted journal article supplement (doi:10.1136/thoraxjnl-2020-215383), 2021-02-23

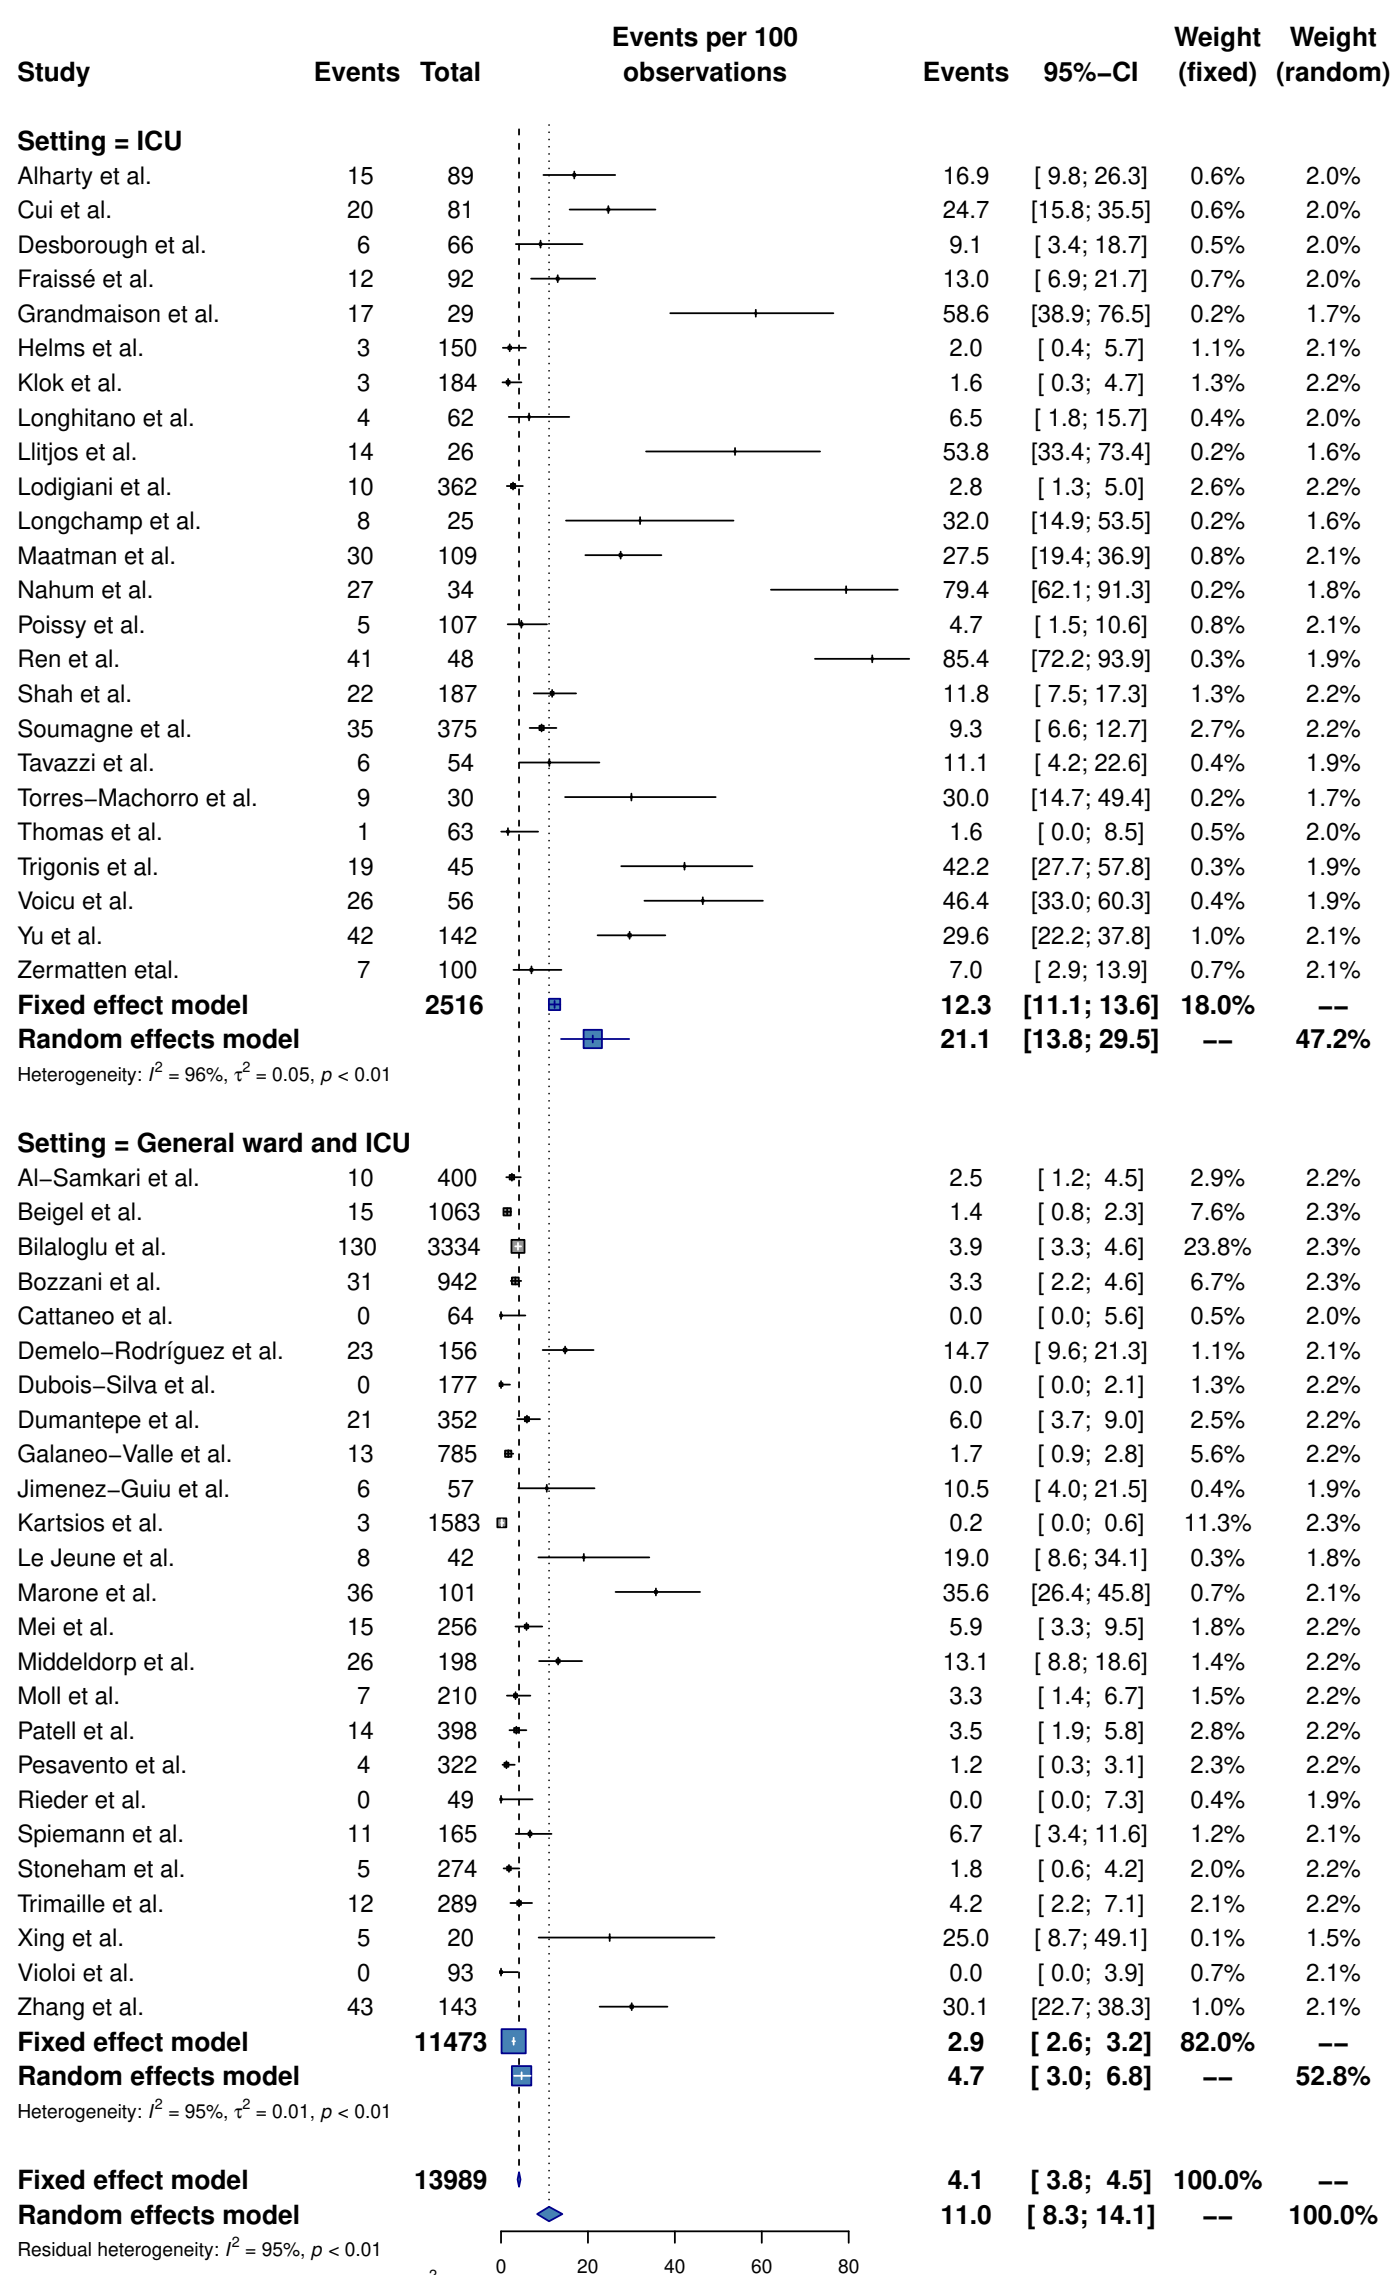

Supplement: thoraxjnl-2020-215383supp004_data_supplement.pdf [file thoraxjnl-2020-215383supp004_data_supplement.pdf]
